# Supplementary material for: Selection of Patients and Anesthetic Types for Endovascular Treatment in Acute Ischemic Stroke: A Meta-Analysis of Randomized Controlled Trials
Source: PubMed Central journal article supplement (PMC4783038; doi:10.1371/journal.pone.0151210), 2016-03-08
Supplement: pone.0151210.s003.pdf [file pone.0151210.s003.pdf]

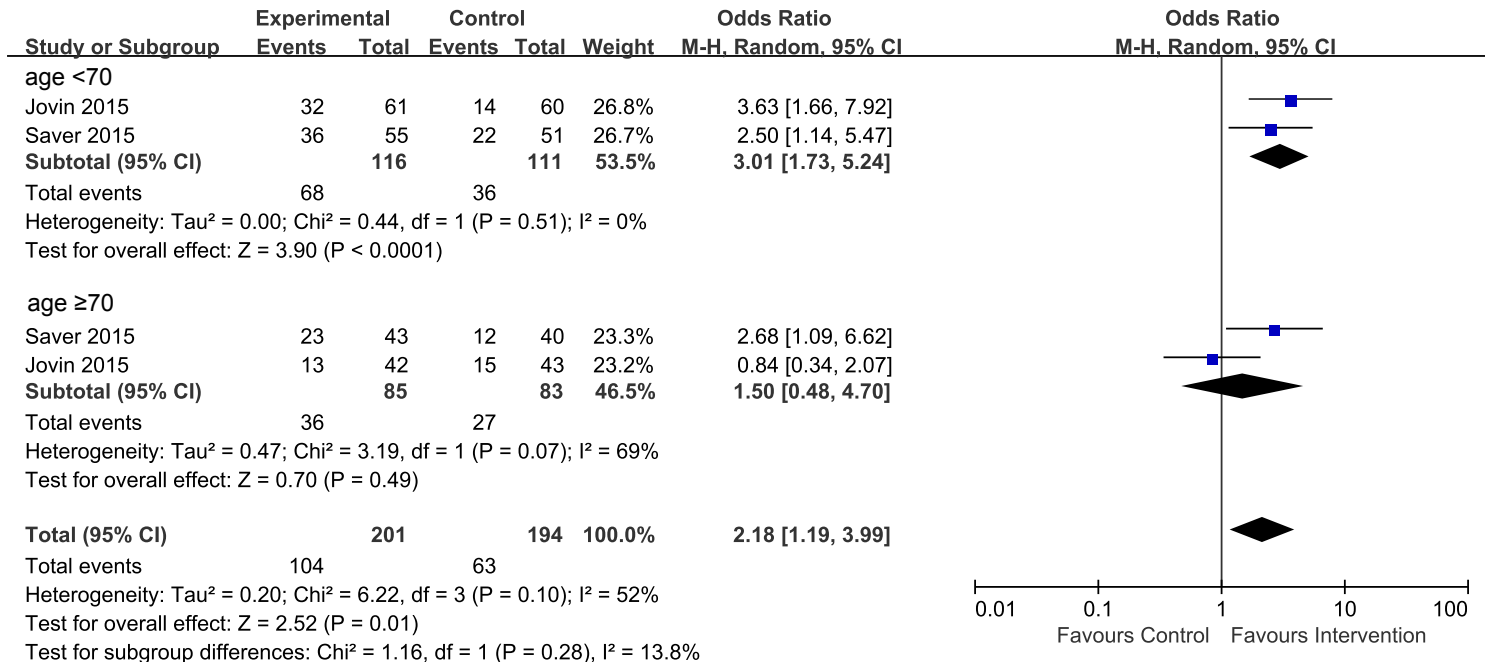

**S3 Figure: Forest plots of 90-day functional independence (mRS 0-2) between endovascular treatment and standard medical care in patients stratified by age.**
